# Supplementary material
Source: PubMed Central journal article supplement (PMC4215647)
Supplement: NIHMS627411-supplement-1.pdf [file NIHMS627411-supplement-1.pdf]

## Supplementary Figures

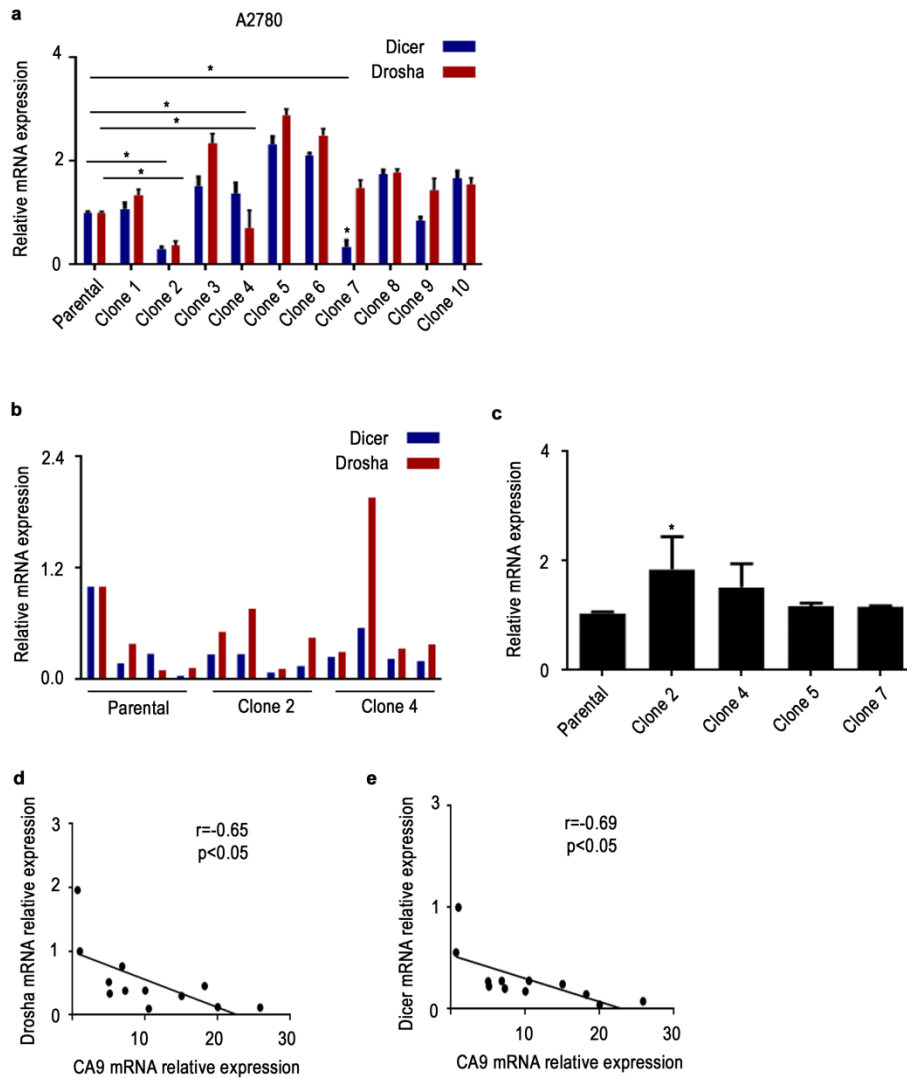

**Supplementary Figure 1:** (a) mRNA expression levels of Drosha and Dicer in single-cell clones derived from A2780 cells. (b) mRNA expression levels of Drosha and Dicer in individual tumor samples from mice injected with A2780 clones (n = 4 per group). (c) Expression of CA9 (hypoxia marker) in single cells clones of A2780 cell line, compared to parental cells. (d-e) Spearman correlation between mRNA expression levels of Dicer and Drosha with carbonic anhydrase 9 (CA9) levels in individual tumor samples from mice injected with parental cells and single-cell clones. Data are presented as mean  $\pm$  standard error of the mean of n  $\geq$  3 independent experimental groups. \*p < 0.05 (Student t test).

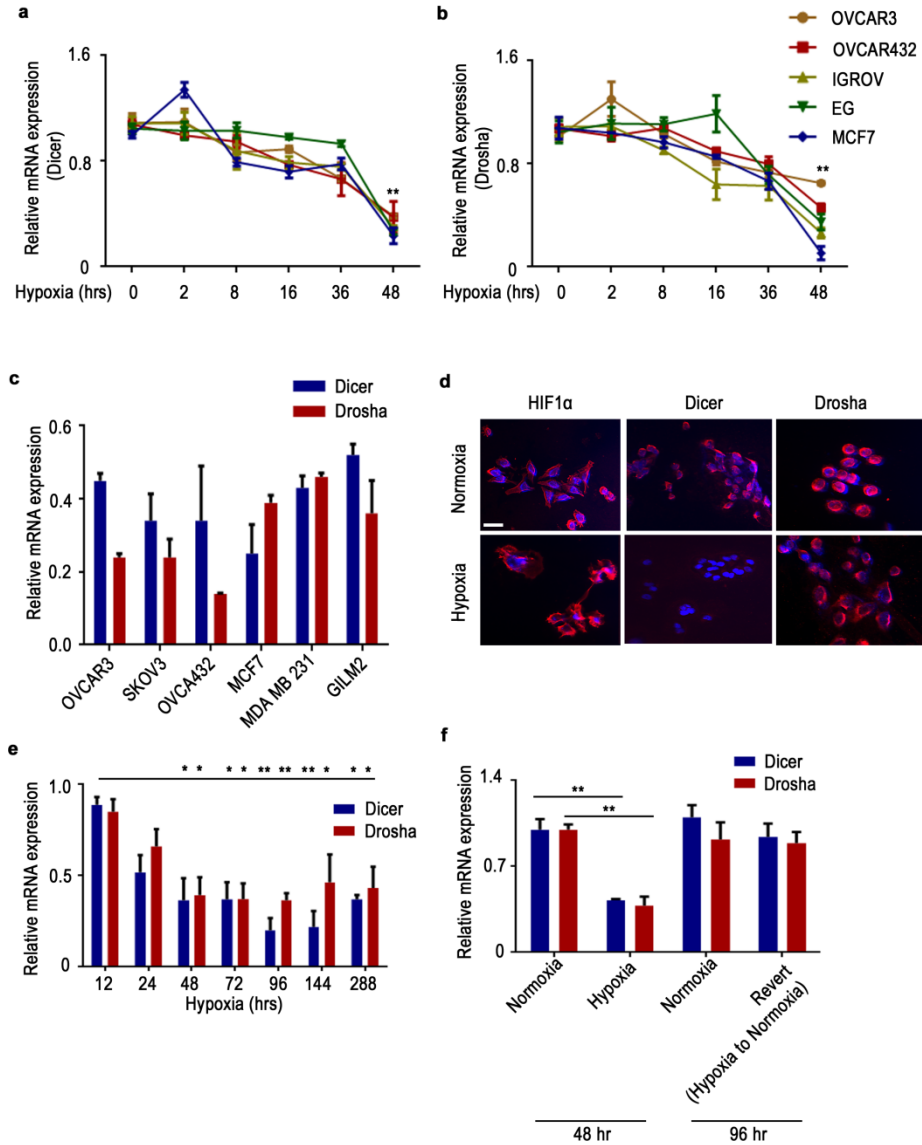

**Supplementary Figure 2: (a and b)** Drosha and Dicer mRNA expression levels under hypoxic conditions for several ovarian and breast cancer cell lines at different time points. **(c)** Drosha and Dicer mRNA expression levels in several ovarian and breast cancer cell lines 48 hrs following hypoxia treatment. Data are normalized to normoxic conditions. **(d)** Protein levels of HIF1α, Dicer, and Drosha in OVCAR3 cells under hypoxic and normoxic conditions at 48 hr time point. Scale bar: 200 μm. **(e)** mRNA expression levels of Drosha and Dicer in A2780 cells after long durations of hypoxic conditions. Data are normalized to normoxic conditions. **(f)** mRNA expression levels of Drosha and Dicer in A2780 cells after 48 hr of hypoxia treatment and reversal to normoxic condition. Data are presented as mean ± standard error of the mean of  $n \geq 3$  independent experimental groups. \* $p < 0.05$ , \*\* $p < 0.01$  (Student *t* test).

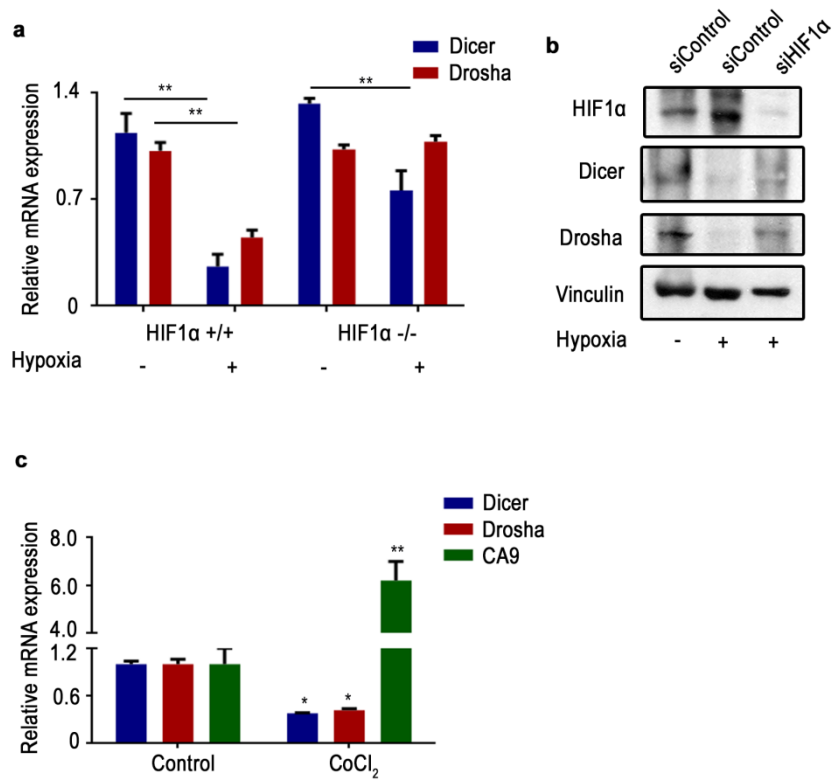

**Supplementary Figure 3:** (a) Drosha and Dicer levels in mouse embryonic fibroblasts with wild-type HIF1α (+/+) or HIF1α-knockout (-/-) mouse embryonic fibroblasts under normoxic and hypoxic conditions for 48 hrs. (b) Western blot analysis of the protein expression of HIF1α, Drosha, and Dicer in cells treated with siControl or siHIF1α in normoxic or hypoxic conditions (48 hr). Vinculin used as loading control. (c) Drosha, Dicer, and CA9 levels in CoCl<sub>2</sub> treated A2780 cells under normoxia. Data are presented as mean ± standard error of the mean of n ≥ 3 independent experimental groups. \*p < 0.05, \*\*p < 0.01 (Student *t* test).

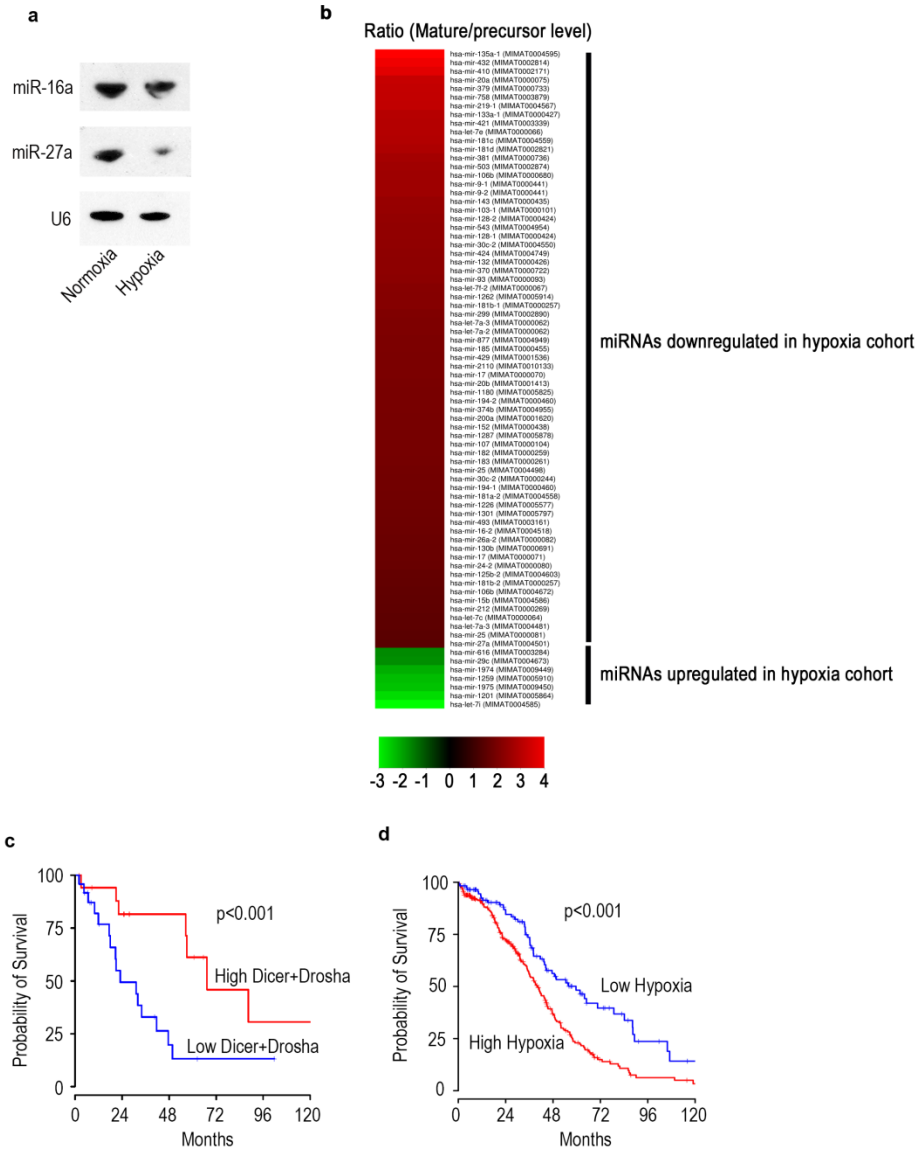

**Supplementary Figure 4: (a)** Northern blot data showing expression of mature miRNAs in RNA samples from normoxia and hypoxia exposed A2780 cells. Probing for U6 used as loading control. **(b)** Heat map depicting the ratio of mature miRNAs to precursor miRNAs in cells with high or low Drosha and Dicer expression levels. **(c)** Kaplan-Meier overall survival curves for Cancer Genome Atlas project (TCGA) samples analyzed for low and high Drosha and Dicer expression levels ( $p < 0.001$ ). **(d)** Analysis of TCGA samples for hypoxia levels and correlation with overall survival duration, plotted using the Kaplan-Meier method ( $p < 0.001$ ).

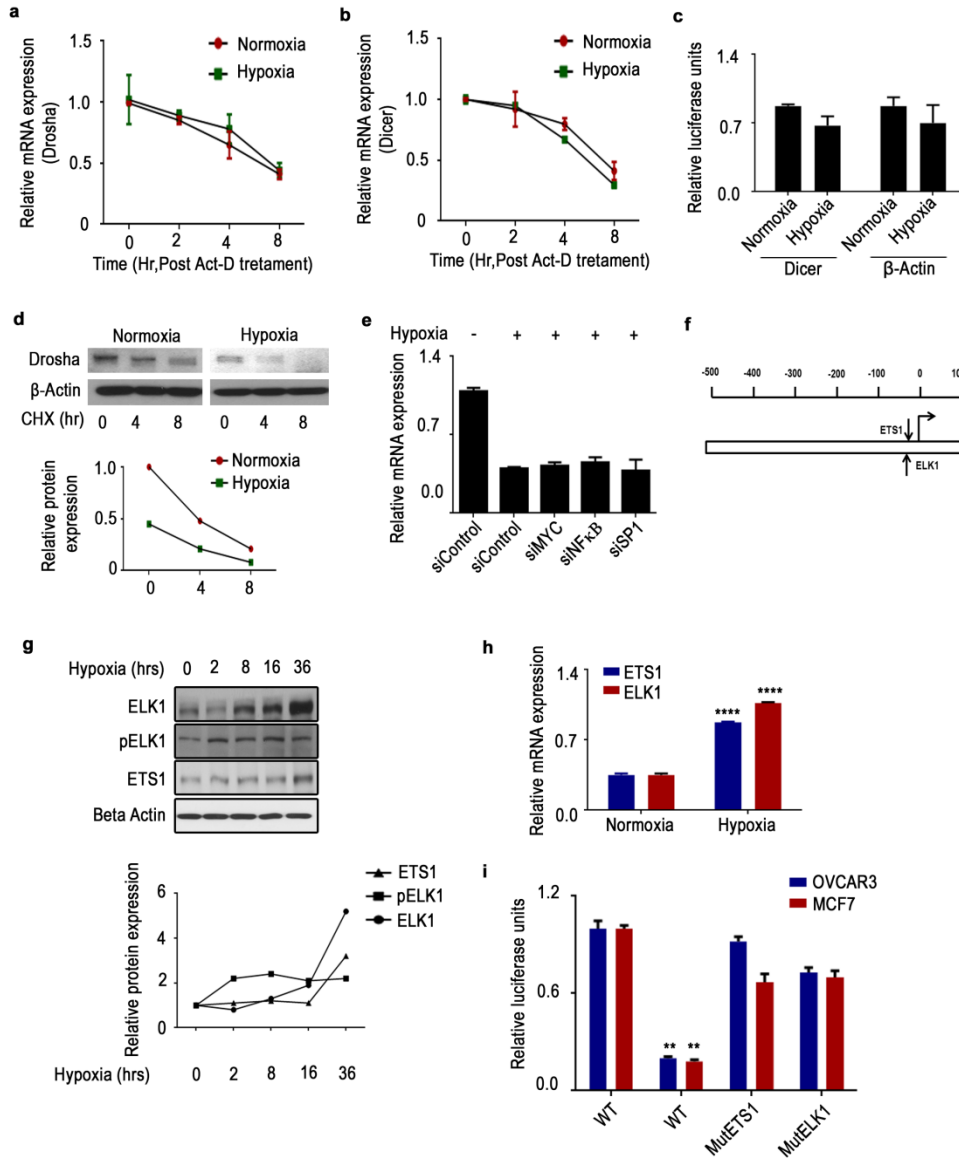

**Supplementary Figure 5:** (a-b) Drosha and Dicer mRNA half-life in A2780 cells exposed to normoxia and hypoxia. (c) Luciferase reporter activity of Dicer promoter region under hypoxia exposure compared to normoxia in A2780 cells. (d) Stability of Drosha protein in A2780 cells exposed to normoxia and hypoxia. Cycloheximide at 100ug/ml was used to block protein synthesis. (e) Drosha mRNA expression after siRNA mediated silencing of Myc, NF- $\kappa$ B, and SP-1 transcription factors under hypoxia exposure in A2780 cells. (f) Graphical representation of ETS1 and ELK1 binding sites on the Drosha promoter region. (g) ETS, ELK1, and pELK1 expression in A2780 cells across several time points. Quantitative data from Western blot are shown. (h) ETS1 and ELK1 mRNA expression levels under hypoxic conditions compared to normoxic conditions in MCF7 cells. (i) Luciferase reporter activity for the wild-type (WT)

Drosha promoter region and the ETS1 or ELK1 binding site–mutant Drosha promoter region under hypoxic conditions in OVCAR3 and MCF7 cells. Data are presented as mean  $\pm$  standard error of the mean of  $n \geq 3$  independent experimental groups. \*\* $p < 0.01$ , \*\*\*\* $p < 0.0001$  (Student *t* test).

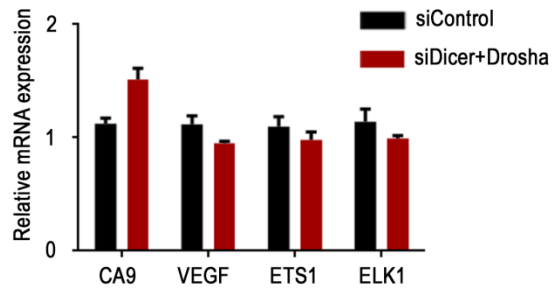

**Supplementary Figure 6:** Expression of CA9, VEGF, ETS1, and ELK1 in A2780 cells treated with siRNA against Dicer and Drosha. Data are presented as mean  $\pm$  standard error of the mean of  $n \geq 3$  independent experimental groups.

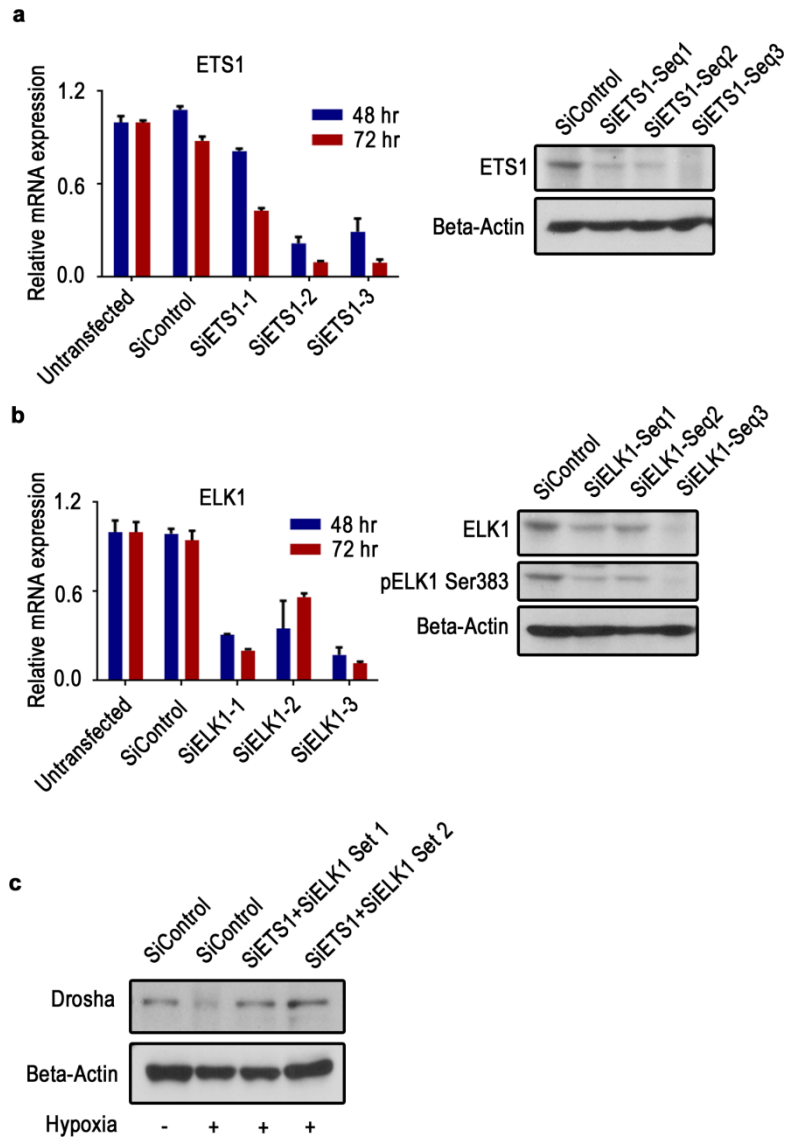

**Supplementary Figure 7:** MRNA and protein expression levels of ETS1 (a) and ELK1 (b) after siRNA-mediated silencing of respective genes using 3 different sequences of siRNA in A2780 cells. (c) Western blot showing Drosha expression under hypoxic conditions, after ETS1 and ELK1 gene knockdown with 2 independent siRNA sequences in A2780 cells. Data are presented as mean  $\pm$  standard error of the mean of  $n \geq 3$  independent experimental groups.



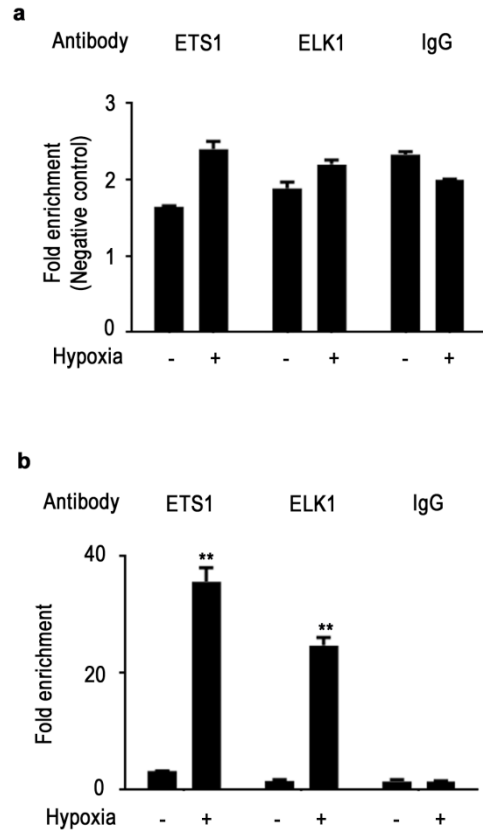

**Supplementary Figure 8:** (a) Fold enrichment 1000 base pair upstream of ETS1 and ELK1 binding region at the Drosha promoter under hypoxia conditions in A2780 cells. (b) Fold enrichment of ETS1 and ELK1 binding at the Drosha promoter region under hypoxic conditions (MCF7), assessed using chromatin immunoprecipitation assays. Data are presented as mean  $\pm$  standard error of the mean of  $n \geq 3$  independent experimental groups. \*\* $p < 0.01$  (Student *t* test).

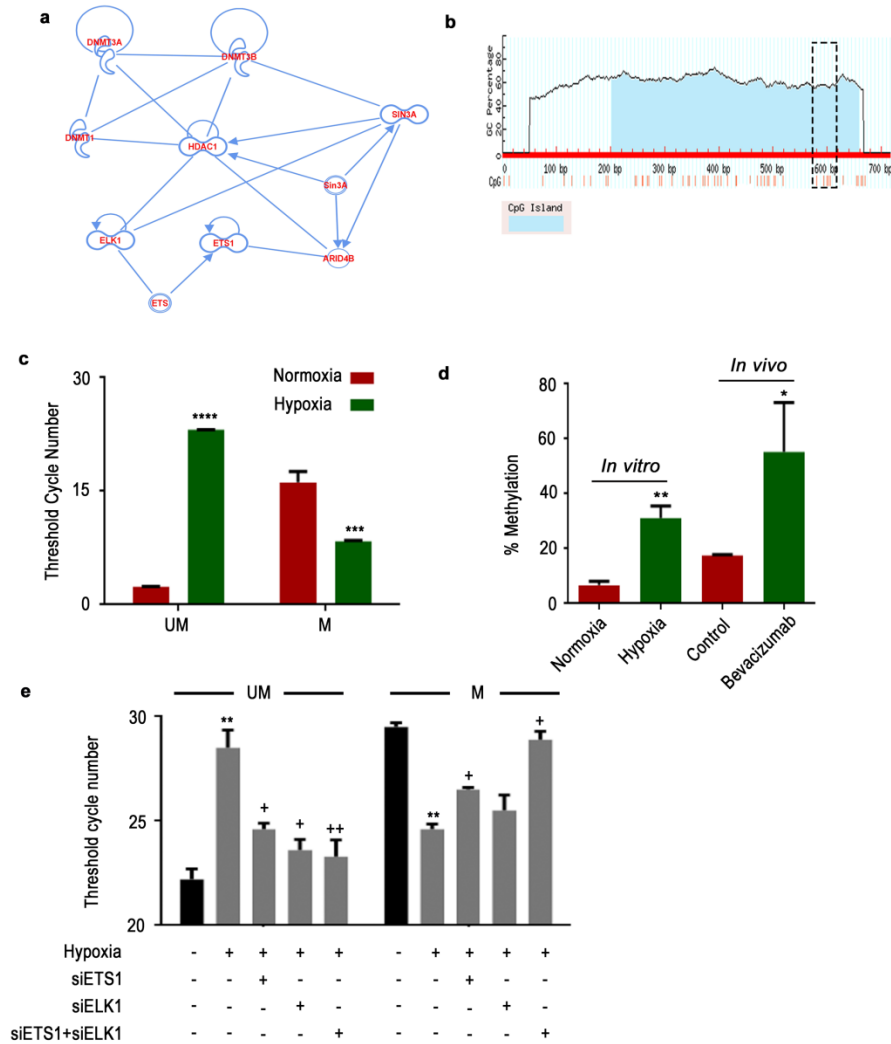

**Supplementary Figure 9:** (a and b) Ingenuity pathway network analysis of possible interacting molecules of ETS1 and ELK1 and graphical representation of the CpG island in the Drosha promoter region. Dotted box highlights the area covered by methylation-specific primers. (c) Threshold cycle number of unmethylated (UM) and methylated (M) targeting primers under normoxic and hypoxic conditions in MCF7 cells. (d) Percentage methylation in Drosha promoter region CpG island measured using methylation specific restriction enzyme analysis. DNA from A2780 cells exposed normoxia and hypoxia were used. (e) Threshold cycle number of unmethylated (UM) and methylated (M) targeting primers under normoxic and hypoxic conditions in A2780 cells treated with hypoxia and siETS1, siELK1 or combinations. Data are presented as mean  $\pm$  standard error of the mean of  $n \geq 3$  independent experimental groups. \* $p < 0.05$ , \*\* $p < 0.01$ , \*\*\* $p < 0.001$  compared to normoxia control, + $p < 0.05$ , ++ $p < 0.01$ , compared to hypoxia control. (Student *t* test).

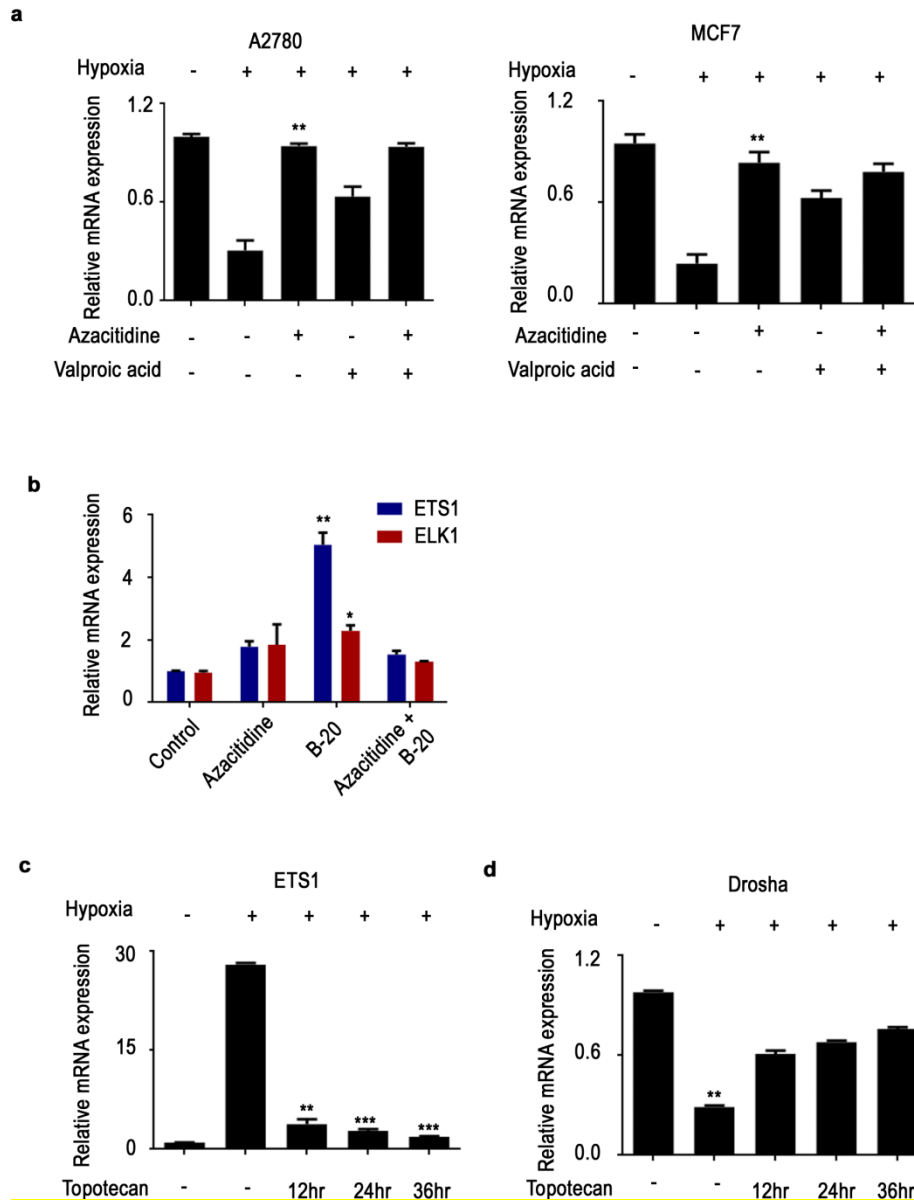

**Supplementary Figure 10:** (a) Drosha expression under hypoxic conditions in A2780 and MCF7 cells exposed to azacitidine and valproic acid either individually or in combination. (b) ETS1 and ELK1 expression levels in tumor samples treated with B-20, azacitidine, or both in a A2780 mouse model of ovarian cancer. ETS1 (c) and Drosha (d) expression in MCF7 cells treated with the HIF1 $\alpha$  inhibitor topotecan under hypoxic conditions. Data are presented as mean  $\pm$  standard error of the mean of  $n \geq 3$  independent experimental groups. \* $p < 0.05$ , \*\* $p < 0.01$ , \*\*\* $p < 0.001$  (Student  $t$  test).

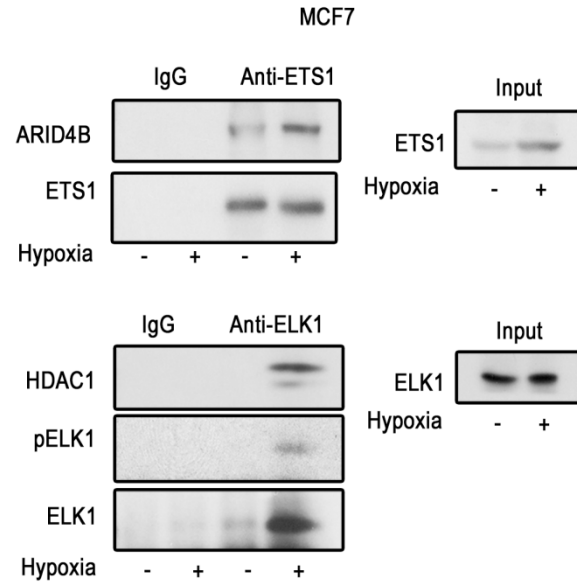

**Supplementary Figure 11:** Immunoprecipitation Western blots showing binding of ETS1 with ARID4B and binding of ELK1 with HDAC1 under hypoxic conditions in MCF7 cells. Data shown from a representative Western blot.

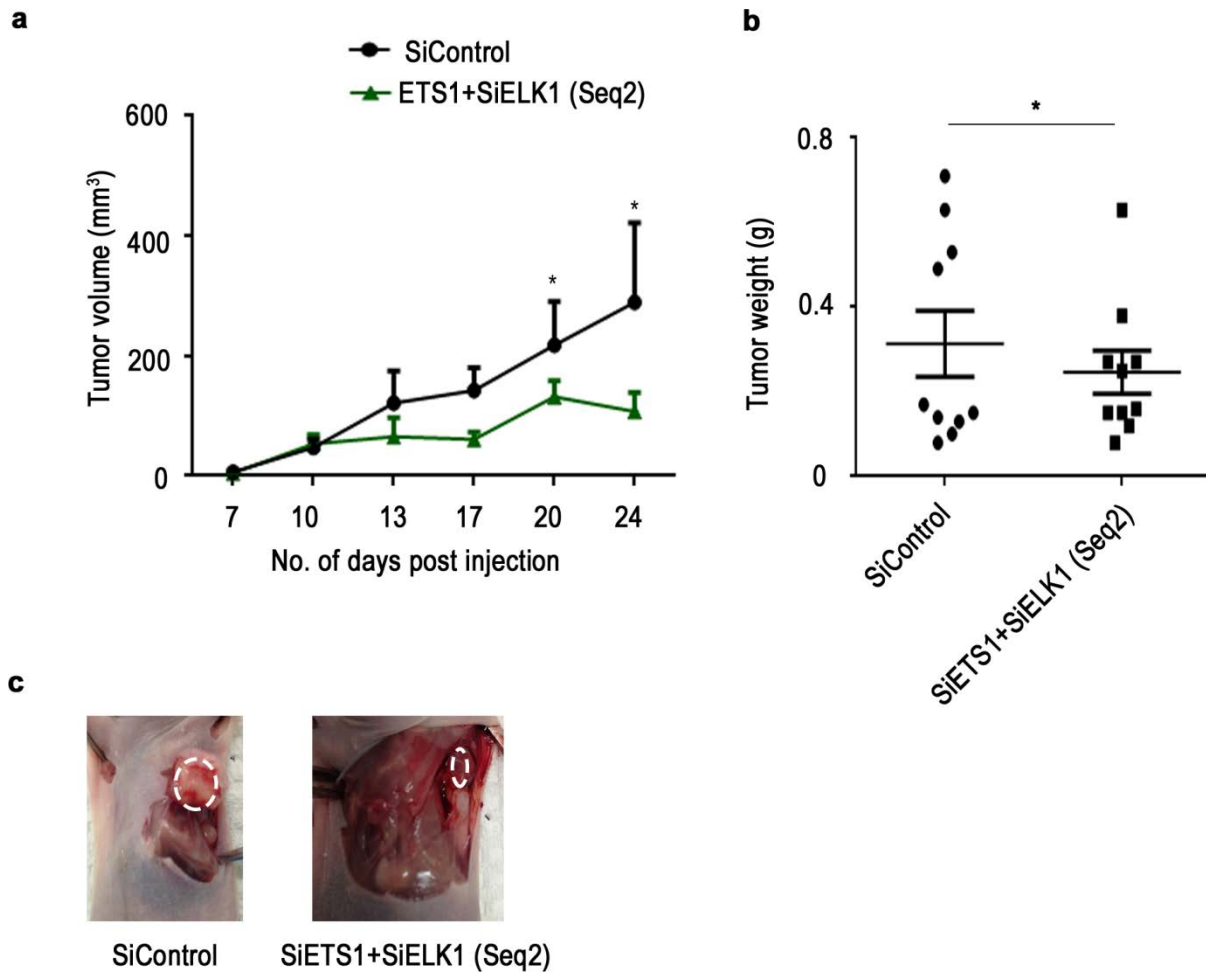

**Supplementary Figure 12:** Effect of silencing ETS1 and ELK1 using siRNAs (Seq2) in the MCF7 mouse model of breast cancer. Tumor volume (**a**) and aggregate tumor weight (**b**) across 2 groups. (**c**) Representative pictures showing tumor burden (white dotted circles) in all the groups. \* $p < 0.05$  (Student *t* test).

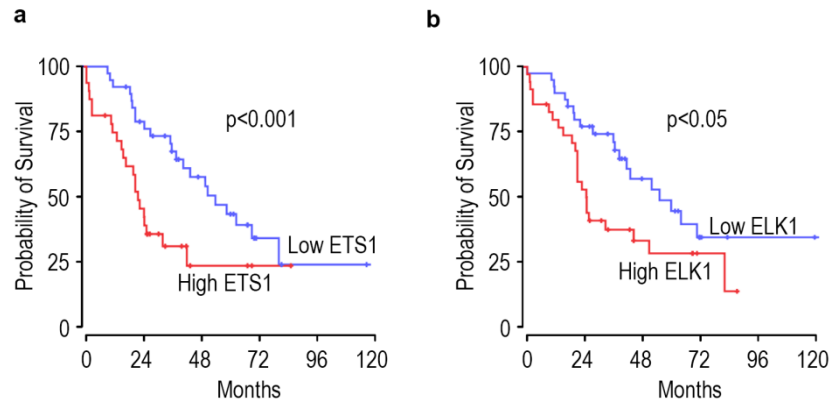

**Supplementary Figure 13:** Overall disease specific survival of patients with human high grade serous ovarian cancer (n=74) based on tumoral ETS1 (a) and ELK1 (b) mRNA expression levels. Kaplan-Meier curves shown; differences in survival were calculated using log rank method.

**a**

mRNA data (Normoxia vs Hypoxia)

| Molecular function                | p Value              |
|-----------------------------------|----------------------|
| Cellular Development              | 3.91E-15 to 1.35E-04 |
| Cellular Growth and Proliferation | 3.94E-15 to 1.35E-04 |
| Cell Death                        | 1.39E-14 to 1.42E-04 |
| Cellular Movement                 | 1.78E-14 to 1.40E-04 |
| Cell Cycle                        | 7.21E-13 to 1.35E-04 |

miRNA data (Normoxia vs Hypoxia)

| Molecular function                | p Value              |
|-----------------------------------|----------------------|
| Cellular Movement                 | 1.37E-06 to 4.27E-02 |
| Cellular Growth and Proliferation | 3.76E-05 to 4.83E-02 |
| Cell Cycle                        | 5.08E-05 to 4.55E-02 |
| Cell Death                        | 6.21E-05 to 3.71E-02 |
| Cellular Development              | 8.23E-05 to 4.83E-02 |

**b**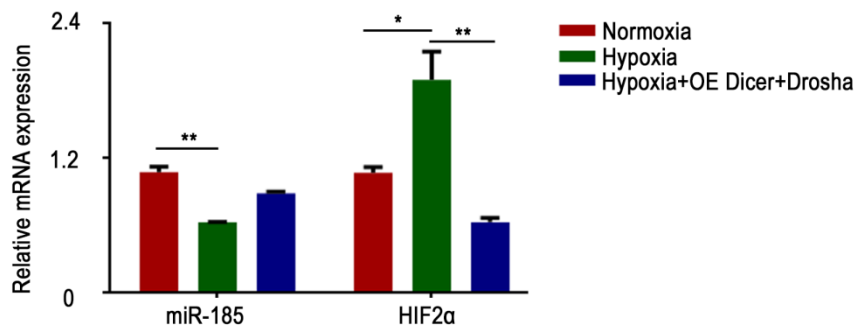

**Supplementary Figure 14:** (a) Top 5 molecular functions that are significantly altered as result of mRNAs (left) or miRNAs (right) deregulated under hypoxic condition. Data are from RNA deep sequencing and miRNA arrays from cells exposed to hypoxia and normoxia. Data were analyzed using ingenuity pathway network analysis. (b) Expression of miR-185 and HIF2 $\alpha$  in A2780 cells exposed normoxia, hypoxia, and cells ectopically expressing Dicer and Drosha exposed hypoxia. Data are presented as mean  $\pm$  standard error of the mean of  $n \geq 3$  independent experimental groups. \* $p < 0.05$ , \*\* $p < 0.01$  (Student *t* test).

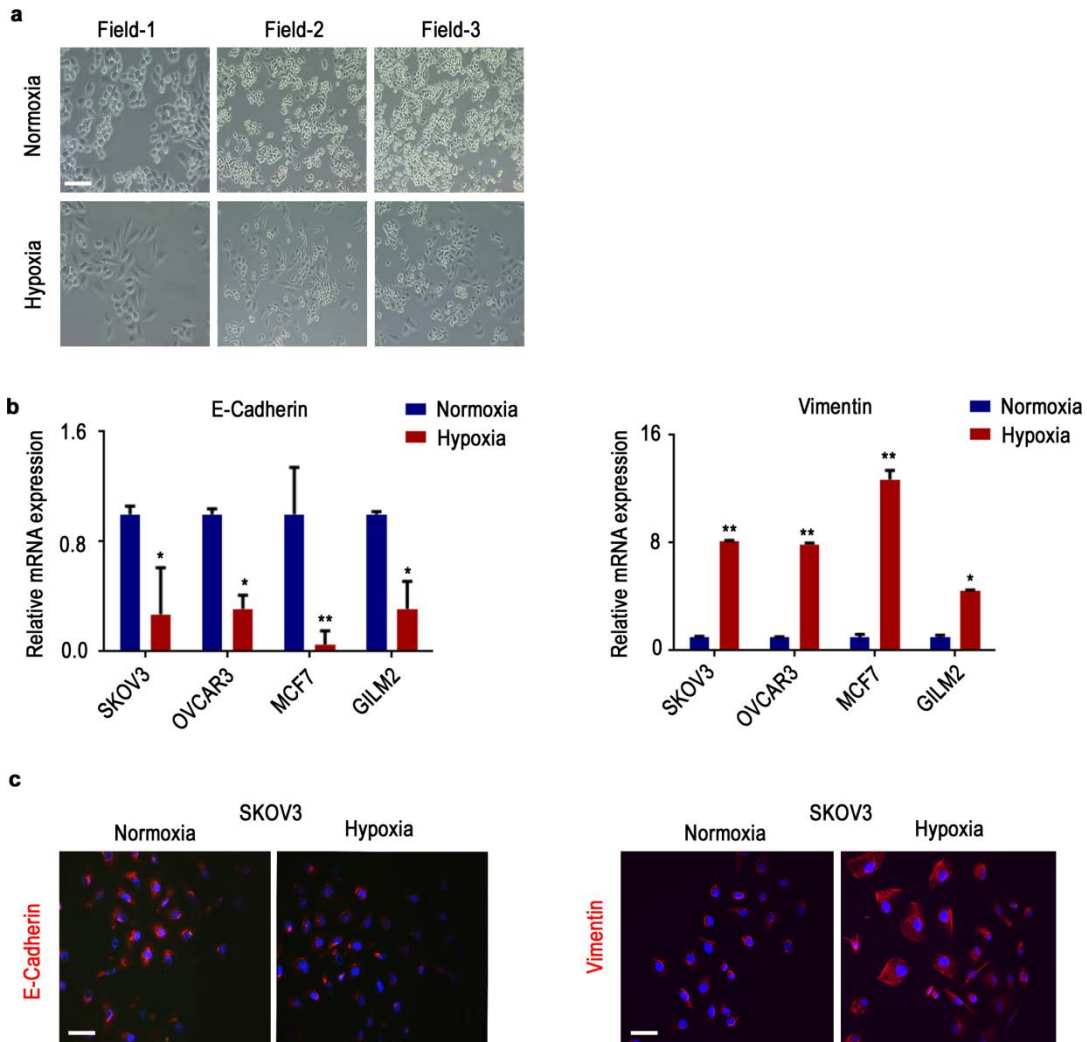

**Supplementary Figure 15:** (a) Phase contrast microscopy representative images showing cell morphology under normoxic and hypoxic conditions in A2780 cells. Scale bar: 400  $\mu\text{m}$ . (b) E-cadherin (left) and vimentin (right) mRNA expression levels under hypoxic conditions in several types of cancer cells. (c) Protein levels of E-cadherin (left) and vimentin (right) under hypoxic conditions, assessed by immunofluorescent staining (red). Blue staining indicates the nucleus. Scale bar: 200  $\mu\text{m}$ . Data are presented as mean  $\pm$  standard error of the mean of  $n \geq 3$  independent experimental groups. \* $p < 0.05$ , \*\* $p < 0.01$  (Student  $t$  test).



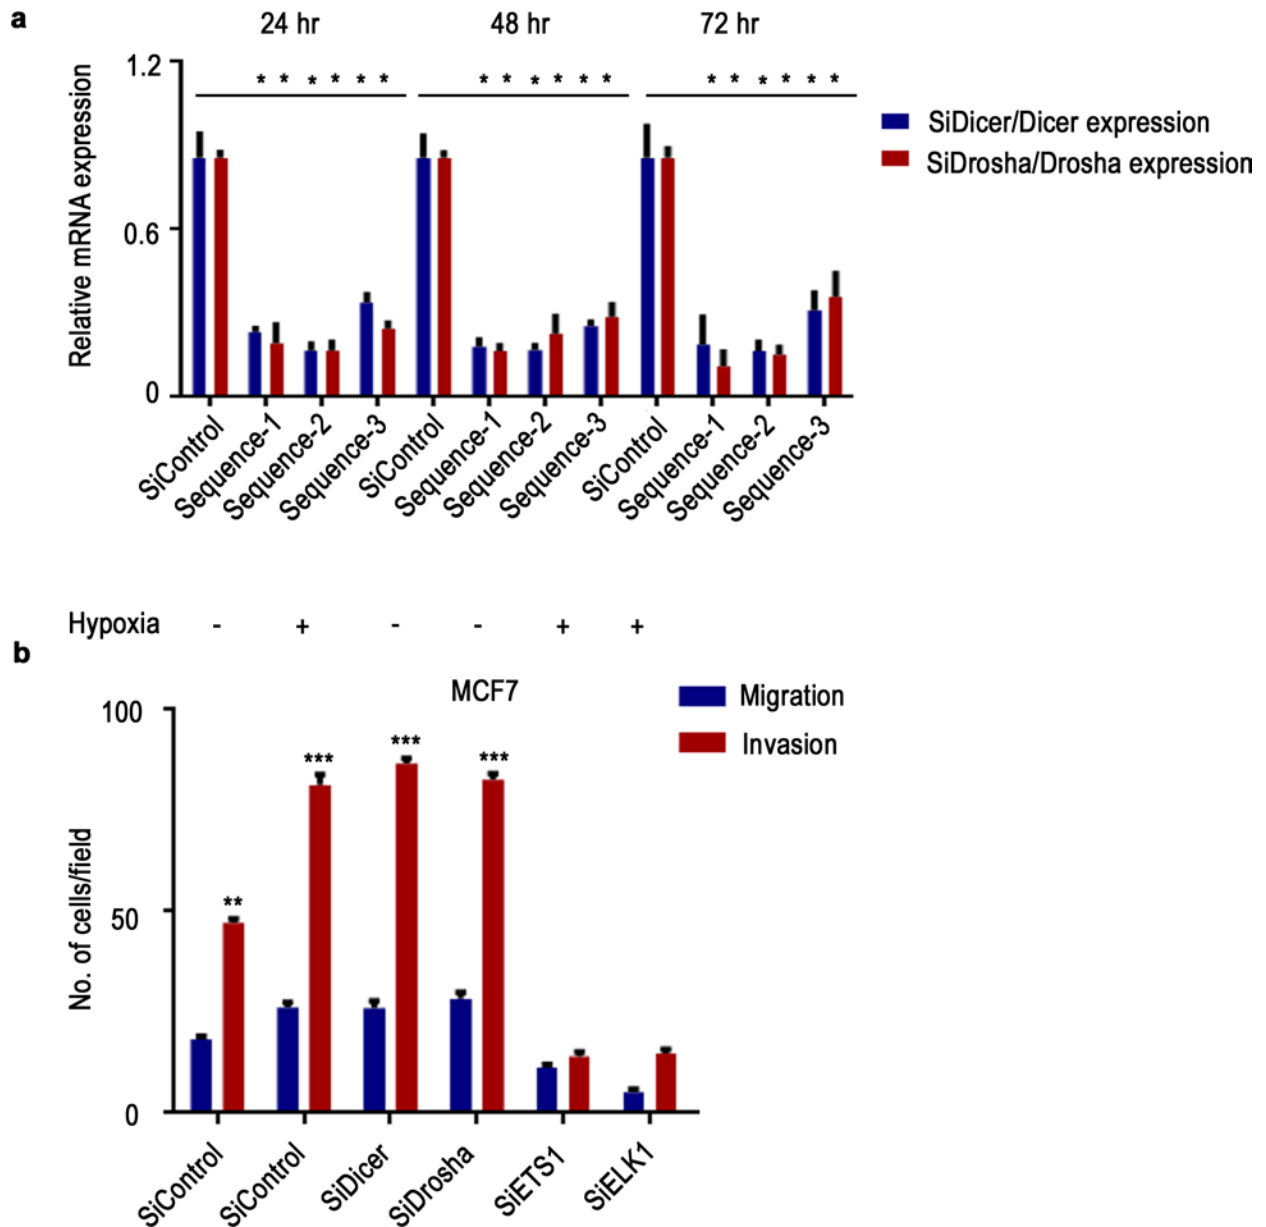

**Supplementary Figure 16:** (a) Drosha and Dicer relative mRNA expression levels after knockdown using 3 independent siRNA sequences across 3 different time points. (b) Migration and invasion of MCF7 cells after Drosha and Dicer knockdown (normoxia) and ETS1 and ELK1 knockdown (hypoxia). Data are presented as mean  $\pm$  standard error of the mean of  $n \geq 3$  independent experimental groups. \* $p < 0.05$ , \*\* $p < 0.01$ , \*\*\* $p < 0.001$  (Student *t* test).

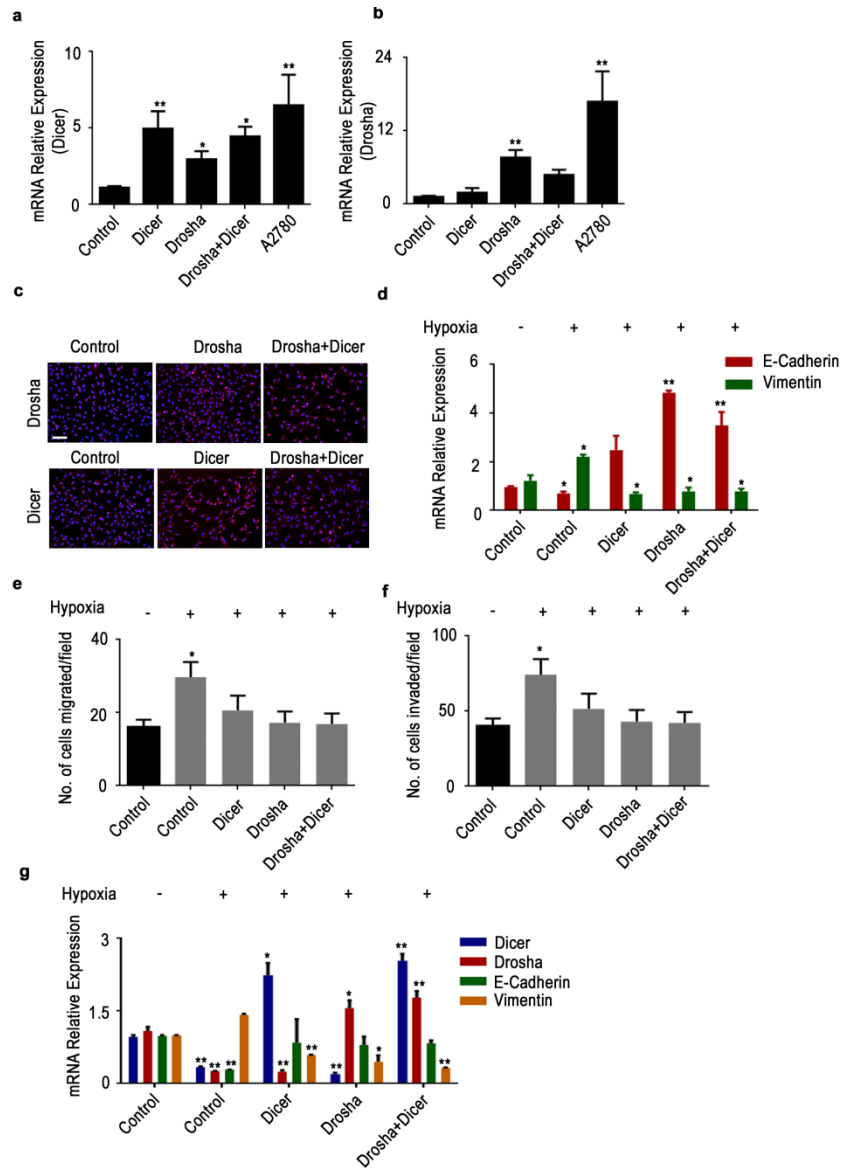

**Supplementary Figure 17: (a and b)** Dicer and Drosha mRNA expression levels in HeyA8 cell line variants ectopically expressing Dicer, Drosha, Drosha+Dicer, compared to relative levels in A2780 cells. **(c)** Protein levels of Drosha and Dicer in HeyA8 cells ectopically expressing Drosha, Dicer or both, analyzed using immunofluorescence microscopy. Scale bar: 200  $\mu$ m. **(d)** Expression of E-Cadherin and Vimentin in the HeyA8 cells expressing Dicer, Drosha, or both and treated with hypoxia. Data were normalized to normoxic cells. **(e and f)** Migration and invasion assay data showing number of cells migrated or invaded in the respective groups of cells ectopically expressing Drosha, Dicer, or both and exposed to

hypoxia. **(g)** Expression of Dicer, Drosha, and EMT markers in A2780 cells exposed normoxia and hypoxia or in cells exposed to hypoxia while ectopically expressing Dicer, Drosha and Drosha+Dicer. Data are presented as mean  $\pm$  standard error of the mean of  $n \geq 3$  independent experimental groups. \* $p < 0.05$ , \*\* $p < 0.01$  (Student *t* test).

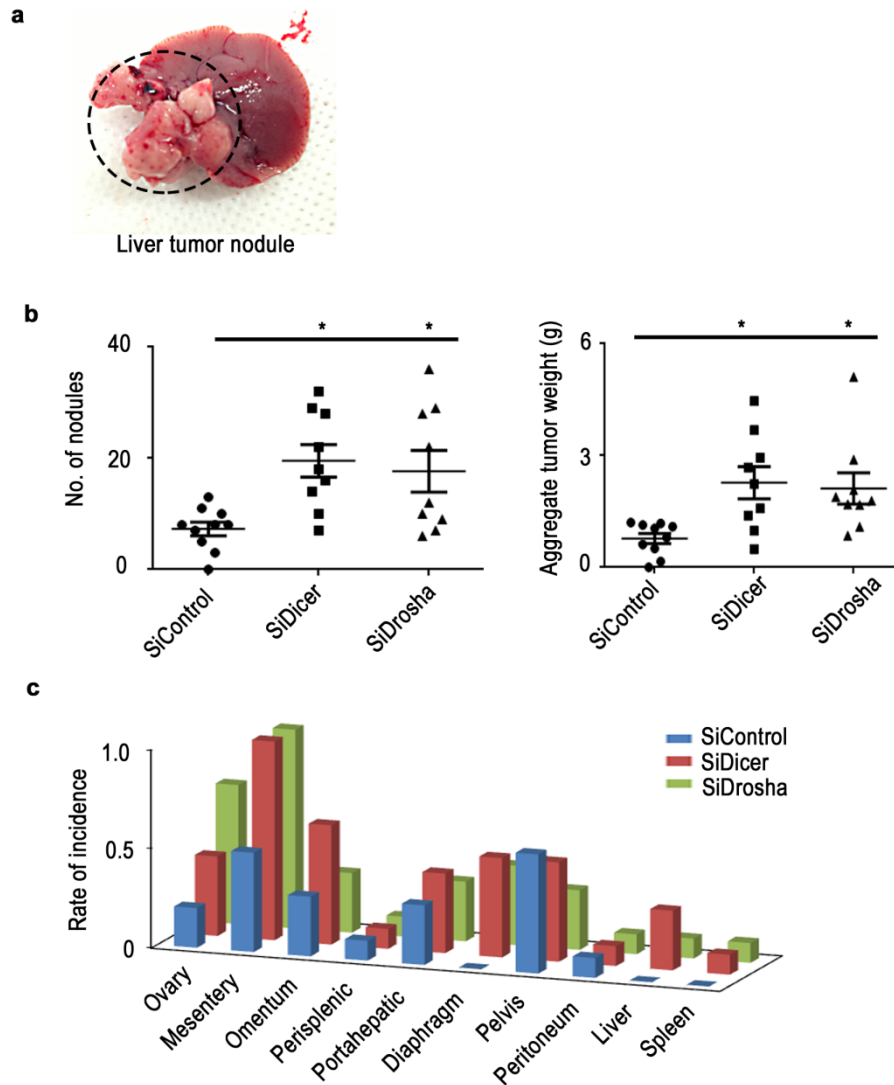

**Supplementary Figure 18:** (a) Photograph illustrating a rare liver metastatic nodule in A2780 orthotopic mice model group treated with siDicer and Drosha. (b) Average number of nodules and aggregate tumor weight in a late-stage metastasis model of ovarian cancer with Drosha and Dicer gene knockdown using siRNAs. (c) Tumor nodule rate of incidence in various metastatic sites in a late-stage metastasis model of ovarian cancer (A2780 cells) with Drosha and Dicer gene knockdown. n = 10 per group. \*p<0.05 (Student *t* test).

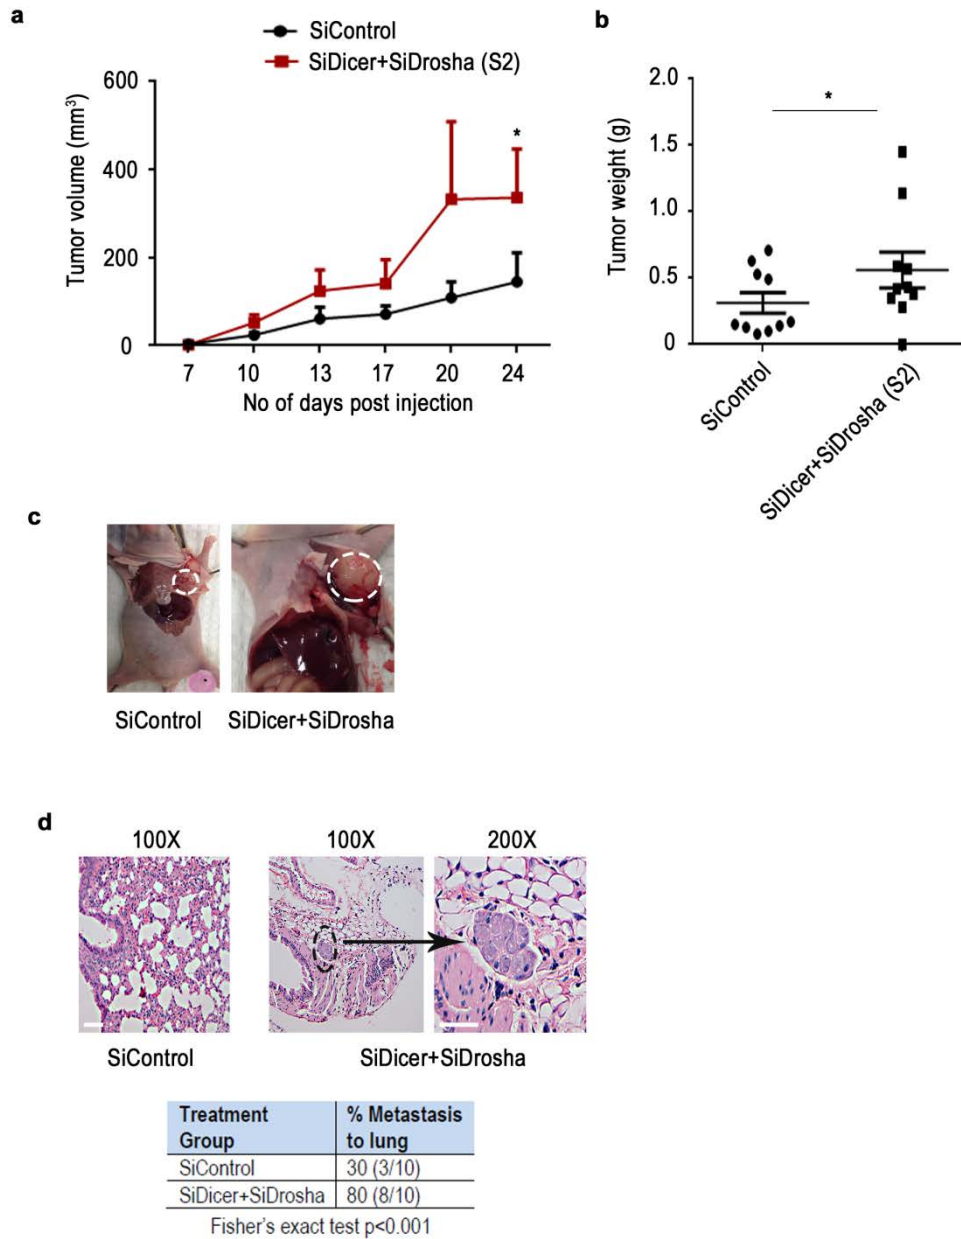

**Supplementary Figure 19:** Effect of silencing Dicer and Drosha using siRNAs (seq 2) in the MCF7 mouse model of breast cancer. Tumor volume (**a**) and aggregate tumor weight (**b**) across 2 groups. (**c**) Representative pictures showing tumor burden (white dotted circles) in all the groups. \* $p < 0.05$  (Student  $t$  test). (**d**) Representative hematoxylin and eosin staining of lungs from the *in vivo* MCF7 mouse model depicting micrometastases in the siDicer+Drosha group (top) and quantification of the micrometastases in the control and siDicer+siDrosha groups (bottom;  $n = 10$  per group). Scale bar: 200  $\mu\text{m}$ .

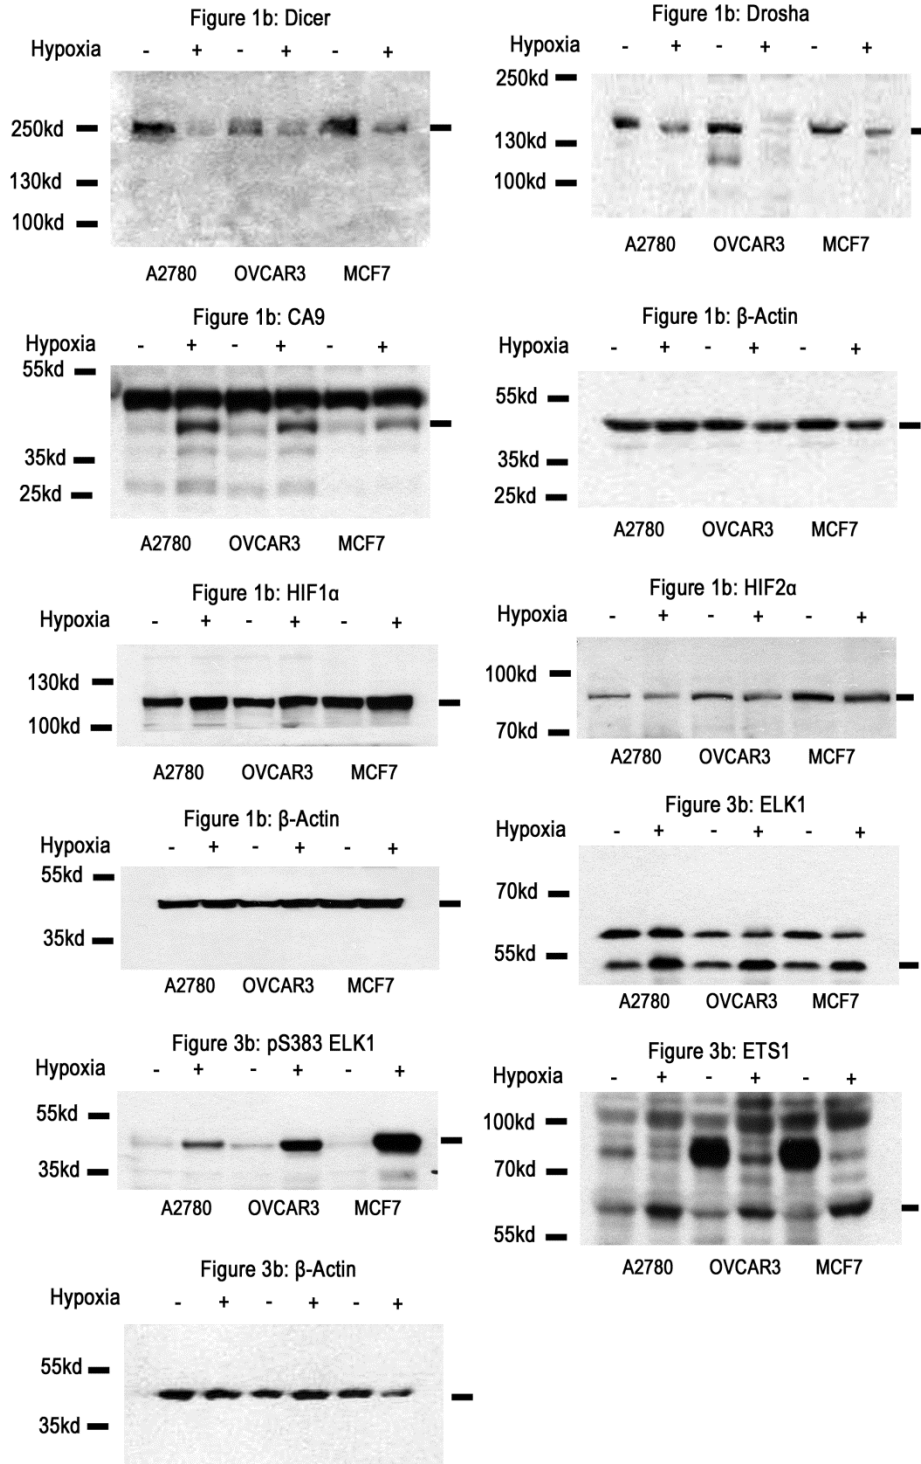

**Supplementary Figure 20: Full scans of Western blots.**

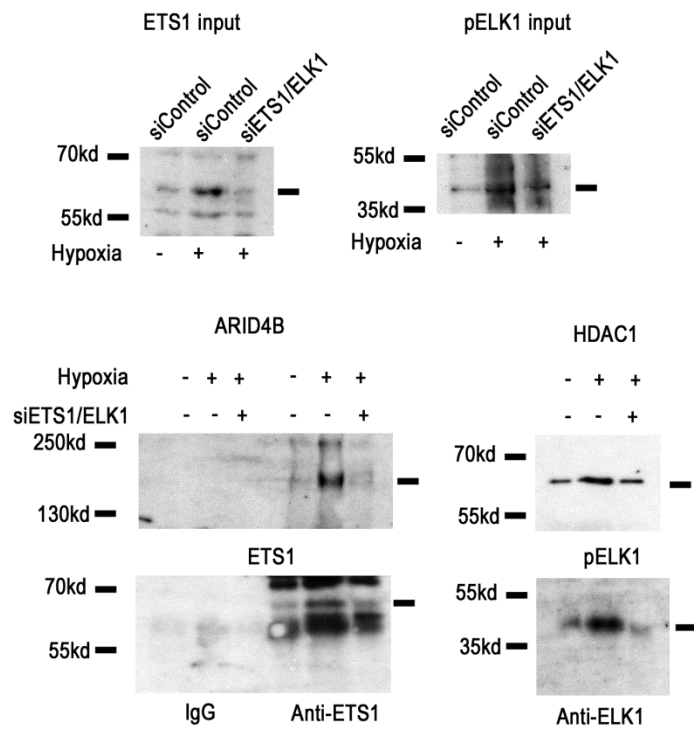

**Supplementary Figure 21:** Full scans of Western blots.

**Supplementary Table 1: Primer and siRNA sequences used in the study.**

| Type                     | Gene                                                    | Sequence                                                                                                     |
|--------------------------|---------------------------------------------------------|--------------------------------------------------------------------------------------------------------------|
| SiRNA                    | Dicer Sequence 1                                        | S 5' CAUUGAUCCUGUCAUGGAU [dT] [dT] 3'<br>AS 5' AUCCAUGACAGGAUCAAUG [dT] [dT] 3'                              |
|                          | Dicer Sequence 2                                        | S 5' GCAGUUUUGAUUUAGCUAA [dT] [dT] 3'<br>AS 5' UUAGCUAAAUCAUAACUGC [dT] [dT] 3'                              |
|                          | Drosha Sequence 1                                       | S 5' CAGUAACUGUGACUGUUGU [dT] [dT] 3'<br>AS 5' ACAACAGUCACAGUUACUG [dT] [dT] 3'                              |
|                          | Drosha Sequence 2                                       | S 5' GGAUUAGCAACCUAUCCGA [dT] [dT] 3'<br>AS 5' UCCGAUAGGUUGCUAAUCC [dT] [dT] 3'                              |
|                          | ETS1 Sequence 1                                         | S 5' GUGAAACCAUAUCAAGUUA [dT] [dT] 3'<br>AS 5' UAACUUGAUUUGGUUUCAC [dT] [dT] 3'                              |
|                          | ETS1 Sequence 2                                         | S 5' CAUAUCAAGUUAUUGGAGU [dT] [dT] 3'<br>AS 5' ACUCCAUAACUUGAUUUG [dT] [dT] 3'                               |
|                          | ELK1 Sequence 1                                         | S 5' GGGUUUGUGUGCCAGAAACCA [dT] [dT] 3'<br>AS 5' UGGUUUCUGGCACAAACCC [dT] [dT] 3'                            |
|                          | ELK1 Sequence 2                                         | S 5' CCUACACGUCUCCUACUU [dT] [dT] 3'<br>AS 5' AAGUAGGAGACGUGUAAGG [dT] [dT] 3'                               |
|                          | HIF1 $\alpha$ Sequence                                  | S 5' CUGAUGACCAGCAACUUGA [dT] [dT] 3'<br>AS 5' UCAAGUUGCUGGUCAUCAG [dT] [dT] 3'                              |
|                          | Primers                                                 | ETS1                                                                                                         |
| ELK1                     |                                                         | F 5'GGCCTTGCGGTACTACTATGAC3' R 5'CCTCAGGGTAGGACACAAAC3'                                                      |
| E Cadherin               |                                                         | F 5'GACCGGTGCAATCTTCAA3' R 5'TTGACGCCGAGAGCTACAC3'                                                           |
| Vimentin                 |                                                         | F 5'ATTCCACTTTGCGTTCAAGG3' R 5'CTTCAGAGAGAGGAAGCCGA3'                                                        |
| CA9                      |                                                         | F 5'CAGCAACTGCTCATAGGCAC3' R 5'CTTTGCCAGAGTTGACGAGG3'                                                        |
| GLUT1                    |                                                         | F 5'GGCATTGATGACTCCAGTGT3' R 5'ATGGAGCCCAGCAGCAA3'                                                           |
| Drosha UM                |                                                         | F 5'GTTTTAAAGGTTTTTTGTTGATGA3' R 5'AAAACAAAACCAACTACTACCACA 3'                                               |
| Drosha M                 |                                                         | F 5'GGTTTTAAAGGTTTTTTGTTGAC3' R 5'CAAACAAAACCAACTACTACCG3'                                                   |
| Drosha (qMethyl Light)   |                                                         | F 5'ACGTAGGGGGAGGGGGCGCG3' R 5'ACCGCCCGCCTCCGGAACA3'                                                         |
| Drosha ChIP              |                                                         | F 5'ATTCCCTCGTTTTCTGTTC3' R 5'TCAGAGCAAAGCCAGGCTAC 3'                                                        |
| Drosha ChIP -ve control  |                                                         | F 5'GAGCCTTAAATGCCAAGCAC3' R 5'ACTGCGCTGACTCCTTATTAC 3'                                                      |
| Drosha promoter ETS1 mut |                                                         | F 5'AATTCCCTCGTTTTCTGTAAAAAGGCGCGGGCGGTGCCACTGTCTTG 3' R 5'CAAGACAGTGGCACCGCCCGCCTTTTTAACAGGAAACCGAGGGAATT3' |
| Drosha promoter ELK1 mut |                                                         | F 5'GGTTTGCTTTTTAATTCCCTCGGTAAAATGAAAAGGAGGCGCGGGCGGTG3' R 5'CACCGCCCGCCTCCTTTTCATTTTACCGAGGGAATTAAGCAAAAC3' |
| 18s                      |                                                         | F 5'CGCCGCTAGAGGTGAAATTC3' R 5'TTGGCAAATGCTTTTCGCTC3'                                                        |
| STAT1                    |                                                         | F 5'TGAATATTTCCCGACTGAGC3' R 5'AGGAAGACCCAATCCAGATGT3'                                                       |
| RHOB1                    |                                                         | F 5'GGGACAGAAGTGCTTCACCT3' R 5'CGACGTCATTCTCATGTGCT3'                                                        |
| TAGLN                    |                                                         | F 5'CTCATGCCATAGGAAGGACC3' R 5'GTCCGAACCCAGACACAAGT 3'                                                       |
| SERTAD2                  |                                                         | F 5'AGCCCATTTTCATGCTCATC3' R 5'CCTCCTGATGCGTTAGTTCC 3'                                                       |
| TXNIP                    |                                                         | F 5'AGGAAGCTCAAAGCCGAACT3' R 5'ACGCTTCTTCTGGAAGACCA3'                                                        |
| JAG1                     |                                                         | F 5'ACTGTCAGGTTGAACGGTGT3' R 5'ATCGTGTGCCTTTCAGTTT3'                                                         |
| JUN                      | F 5'TCTCACAAACCTCCCTCCTG3' R 5'GAGGGGGTTACAACTGCAA3'    |                                                                                                              |
| CTGF                     | F 5'TGGAGATTTTGGGAGTACGG3' R 5'CAGGCTAGAGAAGCAGAGCC3'   |                                                                                                              |
| HIF2 $\alpha$            | F 5'CATCCGGGACTTCTCCT 3' R 5'GTCTGAACGTCTCAAAGGC 3'     |                                                                                                              |
| VEGF                     | F 5'AGCTGCGCTGATAGACATCC 3' R 5'CTACCTCCACCATGCCAAGT 3' |                                                                                                              |



**MatInspector analysis output file showing potential transcription factors binding Drosha promoter region.**

LOCUS GXP\_1499389(RNASEN/human) 716 bp DNA  
DEFINITION loc=GXL\_159340|sym=RNASEN|geneid=29102|acc=GXP\_1499389|  
taxid=9606|spec=Homo sapiens|chr=5|ctg=NC\_000005|str=(-)|  
start=31532067|end=31532782|len=716|tss=501,567,613,615,616|  
descr=ribonuclease type III, nuclear|  
comm=GXT\_22785376/AK308093/616/gold;  
GXT\_22794494/NM\_013235/501/silver;  
GXT\_22794496/NM\_001100412/501/silver;  
GXT\_23730500/ENST00000511367/615/gold;  
GXT\_23730501/ENST00000504483/613/gold;  
GXT\_23730502/ENST00000513349/567/silver  
ACCESSION GXP\_1499389  
COMMENT Matrix matches determined by MatInspector (Genomatix)  
Matrix Family Library Version 8.3 (October 2010)  
FEATURES Location/Qualifiers  
misc\_signal complement(5..19)  
/note="V\$NFKB/CREL.01, mat\_sim: 0.920"  
misc\_signal complement(7..21)  
/note="V\$ZF5F/ZF5.01, mat\_sim: 0.951"  
misc\_signal 11..27  
/note="V\$ABDB/HOXA9.02, mat\_sim: 0.869"  
misc\_signal complement(11..29)  
/note="V\$CDXF/CDX2.02, mat\_sim: 0.871"  
misc\_signal complement(17..27)  
/note="V\$RUSH/SMARCA3.01, mat\_sim: 0.966"  
misc\_signal 16..32  
/note="V\$TALE/TGIF.01, mat\_sim: 1.000"  
misc\_signal 23..33  
/note="O\$INRE/DINR.01, mat\_sim: 0.974"  
misc\_signal complement(20..44)  
/note="V\$SORY/HBP1.01, mat\_sim: 0.901"  
misc\_signal 30..42  
/note="V\$TEAF/TEAD.01, mat\_sim: 0.902"  
misc\_signal 33..49  
/note="V\$ATBF/ATBF1.01, mat\_sim: 0.820"  
misc\_signal 35..51  
/note="V\$BCL6/BCL6.01, mat\_sim: 0.785"  
misc\_signal 36..52  
/note="V\$HNF1/HMBOX.01, mat\_sim: 0.938"  
misc\_signal complement(45..59)  
/note="V\$RREB/RREB1.01, mat\_sim: 0.830"  
misc\_signal 58..72  
/note="V\$DICE/DICE.01, mat\_sim: 0.975"  
misc\_signal 60..78  
/note="V\$XBBF/RFXDC2.01, mat\_sim: 0.908"  
misc\_signal 69..83  
/note="V\$MYBL/CMYB.02, mat\_sim: 0.969"

misc\_signal complement(79..93)  
/note="V\$MYBL/MYBL1.02, mat\_sim: 0.841"  
misc\_signal 77..99  
/note="V\$PPAR/PPARG.01, mat\_sim: 0.699"  
misc\_signal complement(82..100)  
/note="V\$HBOX/EN1.01, mat\_sim: 0.784"  
misc\_signal complement(85..101)  
/note="V\$HNF1/HNF1.04, mat\_sim: 0.846"  
misc\_signal complement(85..107)  
/note="V\$PAX2/PAX2.01, mat\_sim: 0.857"  
misc\_signal 90..106  
/note="V\$HNF1/HMBOX.01, mat\_sim: 0.937"  
misc\_signal complement(96..108)  
/note="V\$MYT1/MYT1L.01, mat\_sim: 0.925"  
misc\_signal complement(95..111)  
/note="V\$HNF1/HNF1.04, mat\_sim: 0.907"  
misc\_signal 115..135  
/note="V\$AP1R/MARE.02, mat\_sim: 0.882"  
misc\_signal complement(123..149)  
/note="V\$CTCF/CTCF.03, mat\_sim: 0.870"  
misc\_signal complement(132..146)  
/note="V\$CAAT/NFY.02, mat\_sim: 0.838"  
misc\_signal complement(147..157)  
/note="V\$WHNF/WHN.01, mat\_sim: 0.964"  
misc\_signal 151..161  
/note="V\$CSEN/DREAM.01, mat\_sim: 0.970"  
misc\_signal complement(152..172)  
/note="V\$ETSF/SPI1\_PU1.02, mat\_sim: 0.968"  
misc\_signal complement(157..173)  
/note="V\$AP4R/AP4.01, mat\_sim: 0.909"  
misc\_signal 161..181  
/note="V\$AP1R/MARE.02, mat\_sim: 0.905"  
misc\_signal complement(195..219)  
/note="V\$RXRF/RAR\_RXR.03, mat\_sim: 0.826"  
misc\_signal 216..230  
/note="V\$GLIF/ZIC2.01, mat\_sim: 0.914"  
misc\_signal complement(217..231)  
/note="V\$HAML/AML3.01, mat\_sim: 0.875"  
misc\_signal complement(217..233)  
/note="V\$EGRF/NGFIC.01, mat\_sim: 0.827"  
misc\_signal complement(228..242)  
/note="V\$RREB/RREB1.01, mat\_sim: 0.842"  
misc\_signal 233..249  
/note="V\$PARF/HLF.01, mat\_sim: 0.843"  
misc\_signal 237..257  
/note="V\$CREB/TAXCREB.01, mat\_sim: 0.849"  
misc\_signal 240..254  
/note="V\$MYBL/VMYB.04, mat\_sim: 0.873"  
misc\_signal complement(250..268)  
/note="V\$GREF/ARE.01, mat\_sim: 0.800"  
misc\_signal complement(252..268)

/note="V\$E2FF/E2F3.01, mat\_sim: 0.981"  
misc\_signal complement(253..267)  
/note="V\$ZF5F/ZF5.01, mat\_sim: 0.960"  
misc\_signal 253..269  
/note="V\$E2FF/E2F2.01, mat\_sim: 0.890"  
misc\_signal 254..268  
/note="V\$ZF5F/ZF5.02, mat\_sim: 0.886"  
misc\_signal complement(259..275)  
/note="V\$EGRF/CKROX.01, mat\_sim: 0.981"  
misc\_signal complement(255..281)  
/note="V\$CTCF/CTCF.04, mat\_sim: 0.794"  
misc\_signal complement(270..286)  
/note="V\$PBXC/PBX1\_MEIS1.01, mat\_sim: 0.751"  
misc\_signal complement(273..285)  
/note="V\$AP1F/AP1.02, mat\_sim: 0.878"  
misc\_signal 272..290  
/note="V\$PAX3/PAX3.02, mat\_sim: 0.867"  
misc\_signal 277..291  
/note="V\$PAX8/PAX8.01, mat\_sim: 0.919"  
misc\_signal complement(282..298)  
/note="V\$E2FF/E2F.02, mat\_sim: 0.957"  
misc\_signal 286..300  
/note="V\$MTF1/MTF-1.02, mat\_sim: 0.860"  
misc\_signal complement(292..306)  
/note="V\$MYBL/MYBL1.02, mat\_sim: 0.836"  
misc\_signal 314..330  
/note="V\$MYOD/MYOD.01, mat\_sim: 1.000"  
misc\_signal complement(315..331)  
/note="V\$MYOD/MYOGENIN.02, mat\_sim: 0.918"  
misc\_signal complement(317..329)  
/note="V\$NEUR/ASCL2.01, mat\_sim: 0.961"  
misc\_signal 329..345  
/note="V\$E2FF/E2F4\_DP2.01, mat\_sim: 0.843"  
misc\_signal 332..344  
/note="V\$IKRS/IK1.01, mat\_sim: 0.924"  
misc\_signal 341..357  
/note="V\$E2FF/E2F3.02, mat\_sim: 0.874"  
misc\_signal complement(341..367)  
/note="V\$CTCF/CTCF.04, mat\_sim: 0.799"  
misc\_signal complement(346..362)  
/note="V\$EVI1/MEL1.02, mat\_sim: 0.994"  
misc\_signal complement(349..361)  
/note="V\$DMTF/DMP1.01, mat\_sim: 0.836"  
misc\_signal 358..376  
/note="V\$CP2F/TCFCP2L1.01, mat\_sim: 0.889"  
misc\_signal 366..382  
/note="V\$KLFS/KLF7.02, mat\_sim: 0.890"  
misc\_signal 367..383  
/note="V\$SP1F/SP1.02, mat\_sim: 0.855"  
misc\_signal 372..382  
/note="O\$XCPE/XCPE1.01, mat\_sim: 0.906"

misc\_signal 368..388  
/note="V\$ETSF/SPI1\_PU1.02, mat\_sim: 0.964"  
misc\_signal complement(370..386)  
/note="V\$NRF1/NRF1.01, mat\_sim: 0.790"  
misc\_signal 371..387  
/note="V\$NRF1/NRF1.01, mat\_sim: 0.811"  
misc\_signal complement(375..389)  
/note="V\$ZF5F/ZF5.01, mat\_sim: 0.951"  
misc\_signal complement(381..391)  
/note="O\$XCPE/XCPE1.01, mat\_sim: 0.825"  
misc\_signal 380..394  
/note="V\$GCMF/GCM1.01, mat\_sim: 0.866"  
misc\_signal 388..400  
/note="V\$GRHL/GRHL1.01, mat\_sim: 0.914"  
misc\_signal complement(389..409)  
/note="V\$IRFF/IRF3.01, mat\_sim: 0.879"  
misc\_signal complement(402..416)  
/note="V\$CAAT/NFY.04, mat\_sim: 0.933"  
misc\_signal complement(410..426)  
/note="V\$HIFF/HIF1.01, mat\_sim: 0.877"  
misc\_signal 408..434  
/note="V\$CTCF/CTCF.01, mat\_sim: 0.818"  
misc\_signal complement(415..429)  
/note="V\$GCMF/GCM1.03, mat\_sim: 0.861"  
misc\_signal 415..431  
/note="V\$KLFS/KLF6.01, mat\_sim: 0.937"  
misc\_signal complement(413..435)  
/note="V\$ZF02/ZNF219.01, mat\_sim: 0.913"  
misc\_signal 417..433  
/note="V\$EGRF/CKROX.01, mat\_sim: 0.996"  
misc\_signal complement(418..432)  
/note="V\$ZF07/ZNF263.01, mat\_sim: 0.982"  
misc\_signal 418..434  
/note="V\$SP1F/GC.01, mat\_sim: 0.921"  
misc\_signal 419..435  
/note="V\$EGRF/WT1.01, mat\_sim: 0.941"  
misc\_signal 421..433  
/note="V\$MAZF/MAZR.01, mat\_sim: 0.916"  
misc\_signal complement(416..438)  
/note="V\$ZF02/ZBP89.01, mat\_sim: 0.985"  
misc\_signal 421..437  
/note="V\$EGRF/EGR1.02, mat\_sim: 0.959"  
misc\_signal 421..437  
/note="V\$KLFS/KLF6.01, mat\_sim: 0.932"  
misc\_signal 419..441  
/note="V\$PLAG/PLAG1.02, mat\_sim: 1.000"  
misc\_signal complement(419..441)  
/note="V\$ZF02/ZNF219.01, mat\_sim: 0.989"  
misc\_signal 423..439  
/note="V\$KLFS/KKLF.01, mat\_sim: 0.919"  
misc\_signal 424..440

/note="V\$SP1F/SP4.01, mat\_sim: 0.945"  
misc\_signal 425..439  
/note="V\$ZF5F/ZF5.01, mat\_sim: 0.958"  
misc\_signal complement(430..436)  
/note="O\$TF2B/BRE.01, mat\_sim: 1.000"  
misc\_signal complement(422..444)  
/note="V\$ZF02/ZBP89.01, mat\_sim: 0.934"  
misc\_signal complement(426..440)  
/note="V\$ZF5F/ZF5.02, mat\_sim: 0.864"  
misc\_signal 428..440  
/note="V\$CDEF/CDE.01, mat\_sim: 0.901"  
misc\_signal 426..442  
/note="V\$E2FF/E2F.03, mat\_sim: 0.857"  
misc\_signal 427..441  
/note="V\$ZF5F/ZF5.02, mat\_sim: 0.845"  
misc\_signal 428..444  
/note="V\$NRF1/NRF1.01, mat\_sim: 0.783"  
misc\_signal 425..447  
/note="V\$PLAG/PLAG1.02, mat\_sim: 1.000"  
misc\_signal complement(425..447)  
/note="V\$ZF02/ZF9.01, mat\_sim: 0.938"  
misc\_signal 429..443  
/note="V\$ZF5F/ZF5.02, mat\_sim: 0.842"  
misc\_signal 432..448  
/note="V\$E2FF/E2F.02, mat\_sim: 0.849"  
misc\_signal 434..450  
/note="V\$LEFF/LEF1.01, mat\_sim: 0.875"  
misc\_signal 435..451  
/note="V\$OAZF/ROAZ.01, mat\_sim: 0.758"  
misc\_signal 434..462  
/note="V\$PRDM/PRDM5.01, mat\_sim: 0.730"  
misc\_signal 446..466  
/note="V\$AP1R/MARE.01, mat\_sim: 0.997"  
misc\_signal 447..467  
/note="V\$CREB/CREB.02, mat\_sim: 0.923"  
misc\_signal 440..478  
/note="O\$TF2D/INR\_DPE.01, mat\_sim: 0.723"  
misc\_signal complement(452..470)  
/note="V\$CLOX/CDP.02, mat\_sim: 0.956"  
misc\_signal complement(455..469)  
/note="V\$CAAT/NFY.04, mat\_sim: 0.932"  
misc\_signal 462..472  
/note="V\$SMAD/SMAD4.01, mat\_sim: 0.993"  
misc\_signal complement(465..475)  
/note="V\$SMAD/SMAD4.01, mat\_sim: 0.993"  
misc\_signal 472..486  
/note="V\$HZIP/HOMEZ.01, mat\_sim: 0.832"  
misc\_signal 479..499  
/note="V\$CREB/CREB.02, mat\_sim: 0.944"  
misc\_signal complement(482..500)  
/note="V\$PAX6/PAX6.01, mat\_sim: 0.751"

misc\_signal complement(484..500)  
/note="V\$E2FF/E2F4\_DP1.01, mat\_sim: 0.964"  
misc\_signal 485..501  
/note="V\$E2FF/E2F4\_DP1.01, mat\_sim: 0.959"  
misc\_signal 485..503  
/note="V\$PAX6/PAX6.03, mat\_sim: 0.835"  
misc\_signal 487..503  
/note="V\$E2FF/RB\_E2F1\_DP1.01, mat\_sim: 0.739"  
misc\_signal complement(490..502)  
/note="V\$YBXF/YB1.01, mat\_sim: 0.907"  
misc\_signal complement(489..505)  
/note="V\$PBXC/PBX1\_MEIS1.01, mat\_sim: 0.777"  
misc\_signal 491..505  
/note="V\$CAAT/NFY.04, mat\_sim: 0.962"  
misc\_signal 490..508  
/note="V\$CLOX/CDP.02, mat\_sim: 0.980"  
misc\_signal 494..508  
/note="V\$GFI1/GFI1.02, mat\_sim: 0.909"  
misc\_signal complement(493..511)  
/note="V\$HOMF/TLX1.01, mat\_sim: 0.960"  
misc\_signal complement(498..510)  
/note="V\$CDEF/CDE.01, mat\_sim: 0.889"  
misc\_signal complement(499..513)  
/note="V\$ZF5F/ZF5.01, mat\_sim: 0.953"  
misc\_signal complement(506..526)  
/note="V\$MOKF/MOK2.02, mat\_sim: 0.997"  
misc\_signal complement(509..529)  
/note="O\$MTEN/DMTE.01, mat\_sim: 0.804"  
misc\_signal 507..533  
/note="V\$CTCF/CTCF.03, mat\_sim: 0.766"  
misc\_signal complement(518..532)  
/note="V\$SREB/SREBP.02, mat\_sim: 0.838"  
misc\_signal complement(524..542)  
/note="V\$NFAT/NFAT5.02, mat\_sim: 0.903"  
misc\_signal complement(531..547)  
/note="V\$E2FF/E2F.01, mat\_sim: 0.782"  
misc\_signal complement(534..544)  
/note="V\$SPZ1/SPZ1.01, mat\_sim: 0.946"  
misc\_signal complement(547..559)  
/note="V\$MYT1/MYT1L.01, mat\_sim: 0.950"  
misc\_signal 556..568  
/note="V\$MEF3/SIX.01, mat\_sim: 0.920"  
misc\_signal complement(561..581)  
/note="V\$ARID/BRIGHT.01, mat\_sim: 0.936"  
misc\_signal 562..580  
/note="V\$HOMF/HHEX.01, mat\_sim: 0.976"  
misc\_signal 564..580  
/note="V\$ATBF/ATBF1.01, mat\_sim: 0.816"  
misc\_signal complement(563..581)  
/note="V\$BRNF/TST1.01, mat\_sim: 0.983"  
misc\_signal complement(563..583)

/note="V\$CART/ALX4.01, mat\_sim: 0.821"  
misc\_signal 565..583  
/note="V\$CDXF/CDX1.02, mat\_sim: 0.845"  
misc\_signal complement(565..583)  
/note="V\$HBOX/EN1.01, mat\_sim: 0.782"  
misc\_signal complement(565..583)  
/note="V\$HOXF/HOXB8.01, mat\_sim: 0.892"  
misc\_signal complement(567..583)  
/note="V\$ABDB/HOXC9.01, mat\_sim: 0.863"  
misc\_signal 566..584  
/note="V\$HOMF/MSX.01, mat\_sim: 0.977"  
misc\_signal 568..582  
/note="V\$NKX6/NKX61.01, mat\_sim: 0.954"  
misc\_signal 568..586  
/note="V\$HOXF/HOXC8.01, mat\_sim: 0.851"  
misc\_signal 579..591  
/note="V\$ZFHX/AREB6.04, mat\_sim: 0.985"  
**misc\_signal complement(577..597)**  
**/note="V\$ETSF/ELK1.02, mat\_sim: 0.910"**  
misc\_signal complement(578..598)  
/note="V\$IRFF/IRF7.01, mat\_sim: 0.870"  
**misc\_signal complement(583..603)**  
**/note="V\$ETSF/ELK1.02, mat\_sim: 0.938"**  
**misc\_signal 588..608**  
**/note="V\$ETSF/CETS1P54.01, mat\_sim: 0.921"**  
misc\_signal complement(599..605)  
/note="O\$TF2B/BRE.01, mat\_sim: 1.000"  
misc\_signal 595..611  
/note="V\$E2FF/E2F.03, mat\_sim: 0.860"  
misc\_signal 596..612  
/note="V\$EGRF/EGR1.03, mat\_sim: 0.902"  
misc\_signal complement(596..612)  
/note="V\$NRF1/NRF1.01, mat\_sim: 0.792"  
misc\_signal 597..613  
/note="V\$NRF1/NRF1.01, mat\_sim: 0.783"  
misc\_signal 591..621  
/note="V\$NRSF/NRSE.01, mat\_sim: 0.698"  
misc\_signal 599..615  
/note="V\$SP1F/SP1.03, mat\_sim: 0.928"  
misc\_signal 613..639  
/note="V\$AIRE/AIRE.01, mat\_sim: 0.870"  
misc\_signal complement(639..655)  
/note="V\$LEFF/LEF1.03, mat\_sim: 0.831"  
misc\_signal complement(643..661)  
/note="V\$SNAP/PSE.01, mat\_sim: 0.859"  
misc\_signal 646..666  
/note="V\$CREB/ATF.01, mat\_sim: 0.941"  
misc\_signal 664..684  
/note="V\$MOKF/MOK2.02, mat\_sim: 0.994"  
**TATA binding misc\_signal complement(672..688)**  
**/note="O\$VTBP/VTATA.01, mat\_sim: 0.999"**

misc\_signal complement(675..689)  
/note="O\$PTBP/PTATA.02, mat\_sim: 0.925"  
misc\_signal complement(675..691)  
/note="V\$ABDB/HOXD13.01, mat\_sim: 0.941"  
misc\_signal 678..700  
/note="V\$PERO/PPARG.02, mat\_sim: 0.895"  
misc\_signal 679..703  
/note="V\$NR2F/TR4.02, mat\_sim: 0.787"  
misc\_signal 686..706  
/note="V\$MOKF/MOK2.02, mat\_sim: 0.980"  
misc\_signal 684..708  
/note="V\$SORY/SOX9.03, mat\_sim: 0.785"  
misc\_signal complement(685..709)  
/note="V\$SORY/SOX9.03, mat\_sim: 0.811"  
misc\_signal 689..711  
/note="V\$PLAG/PLAGL1.02, mat\_sim: 0.900"  
misc\_signal complement(693..707)  
/note="V\$SF1F/FTF.01, mat\_sim: 0.970"  
misc\_signal complement(691..711)  
/note="V\$PTF1/PTF1.01, mat\_sim: 0.761"  
BASE COUNT 114 a 215 c 209 g 178 t

ORIGIN

ACTCGTAGGAAGCGCCATAAATGTCAGTTCTCATTCTTCCCTAGTTAGCTGTTTTGGGGTC  
CTCTCCACAGCAACGGAATAGGGCAGTTTAACTCTGGTTAACTCTCTGGCCTCCGATGCTA  
AGGTTGCGCCCTCTGCTTGGCCCTCTGAGCGTCAGGGCTTCCGCTGATTCTGCCCCAGAG  
CCCTGTTGCCGTCGGCTCACCTCCTGATGATCCTCCACCACCCACACTGGGAGCTTGGGG  
TAACGCCGGAGACCAGCGCGCCCTCCCGCGGAGTCACTCATGTTTTTTCGCCCCGTCAGTT  
TTGCAGTAAAGCGGTGGCAGCTGGAGAAGACCCGGGAAAGCCGGCGCCTCATCCCGGCC  
AGCTCTCTCCGGGCGGAAGCGCTCCCTCACCCGGTTGCGTTTTTCGGATTGGAGGACGTAG  
GGGAGGGGGCGCGGGCTCCAAAGGGTCTTTTGCTGACGATTGGTCTAGACGTCCATCG  
CTTTCGTTGACGCGCAATCACCGCGCACAAGGCCCTGCGGTGGGCTGAAGAGTTTTCCC  
TCCCTTGGCCCAGCTTCTCAGGTTTGCTTTTTAATCCCTCGGTTTCCTGTTCCGGAGGC  
GCGGGCGGTGCCACTGTCTTGGTACCTGCGGTAGTAGCCTGGCTTTGCTCTGACGGCGAT  
CTCGCGGCCCGAGAGCCTTTTATAGGTAAAAGGGGTACCTTGCAAGTGTTAGAAG
